# Supplementary material
Source: PubMed Central journal article supplement (PMC4184986)
Supplement: NIHMS611408-supplement-Supp_Material.pdf [file NIHMS611408-supplement-Supp_Material.pdf]

# Web-Based Supplementary Materials for “Prevalence Estimation Subject to Misclassification: The Mis-Substitution Bias and Some Remedies”

Zhiwei Zhang<sup>1,\*</sup>, Chunling Liu<sup>2</sup>, Sungduk Kim<sup>3</sup> and Aiyi Liu<sup>3</sup>

<sup>1</sup>Division of Biostatistics, Office of Surveillance and Biometrics, Center for Devices and Radiological Health, Food and Drug Administration, Silver Spring, Maryland, USA

<sup>2</sup>Department of Applied Mathematics, Hong Kong Polytechnic University, Hong Kong, PR China

<sup>3</sup>Biostatistics and Bioinformatics Branch, Division of Intramural Population Health Research, *Eunice Kennedy Shriver* National Institute of Child Health and Human Development, National Institutes of Health, Bethesda, Maryland, USA

\*zhiwei.zhang@fda.hhs.gov

## Web Appendix A: Information Formulas

We first consider the VS design, where  $V$  is allowed to depend on  $T$  but not on  $k$ , so the sampling mechanism is fully described by  $\gamma = (\gamma_1, \gamma_0)$ . Let (Se, Sp) be specified through parameters  $(\alpha, \beta)$ , as in the VGS design. In a group of size  $k$ , the Fisher information for  $\theta = (\lambda, \alpha, \beta)$  is given by

$$\mathbf{I}_k = \begin{pmatrix} \mathbf{I}_{11} & \mathbf{I}_{12} & \mathbf{I}_{13} \\ \mathbf{I}_{21} & \mathbf{I}_{22} & \mathbf{I}_{23} \\ \mathbf{I}_{31} & \mathbf{I}_{32} & \mathbf{I}_{33} \end{pmatrix},$$

where

$$\begin{aligned} \mathbf{I}_{11} &= \left( \frac{1 - \gamma_1}{p_k} + \frac{1 - \gamma_0}{1 - p_k} \right) \left( \frac{\partial p_k}{\partial \lambda} \right)^2 + \left( \frac{\text{Se}_k \gamma_1 + (1 - \text{Se}_k) \gamma_0}{\pi_k} + \frac{(1 - \text{Se}_k) \gamma_1 + \text{Se}_k \gamma_0}{1 - \pi_k} \right) \left( \frac{\partial \pi_k}{\partial \lambda} \right)^2, \\ \mathbf{I}_{22} &= \left( \frac{1 - \gamma_1}{p_k} + \frac{1 - \gamma_0}{1 - p_k} \right) \left( \frac{\partial p_k}{\partial \alpha} \right)^{\otimes 2} + \pi_k \left( \frac{\gamma_1}{\text{Se}_k} + \frac{\gamma_0}{1 - \text{Se}_k} \right) \left( \frac{\partial \text{Se}_k}{\partial \alpha} \right)^{\otimes 2}, \\ \mathbf{I}_{33} &= \left( \frac{1 - \gamma_1}{p_k} + \frac{1 - \gamma_0}{1 - p_k} \right) \left( \frac{\partial p_k}{\partial \beta} \right)^{\otimes 2} + (1 - \pi_k) \left( \frac{\gamma_1}{1 - \text{Sp}_k} + \frac{\gamma_0}{\text{Sp}_k} \right) \left( \frac{\partial \text{Sp}_k}{\partial \beta} \right)^{\otimes 2}, \\ \mathbf{I}_{21} &= \left( \frac{1 - \gamma_1}{p_k} + \frac{1 - \gamma_0}{1 - p_k} \right) \left( \frac{\partial p_k}{\partial \lambda} \right) \left( \frac{\partial p_k}{\partial \alpha} \right) + (\gamma_1 - \gamma_0) \left( \frac{\partial \pi_k}{\partial \lambda} \right) \left( \frac{\partial \text{Se}_k}{\partial \alpha} \right) = \mathbf{I}_{12}^T, \\ \mathbf{I}_{31} &= \left( \frac{1 - \gamma_1}{p_k} + \frac{1 - \gamma_0}{1 - p_k} \right) \left( \frac{\partial p_k}{\partial \lambda} \right) \left( \frac{\partial p_k}{\partial \beta} \right) + (\gamma_1 - \gamma_0) \left( \frac{\partial \pi_k}{\partial \lambda} \right) \left( \frac{\partial \text{Sp}_k}{\partial \beta} \right) = \mathbf{I}_{13}^T, \\ \mathbf{I}_{23} &= \left( \frac{1 - \gamma_1}{p_k} + \frac{1 - \gamma_0}{1 - p_k} \right) \left( \frac{\partial p_k}{\partial \alpha} \right) \left( \frac{\partial p_k}{\partial \beta} \right) = \mathbf{I}_{32}^T, \end{aligned}$$

$\text{Se}_k = \text{Se}(k; \alpha)$ ,  $\text{Sp}_k = \text{Sp}(k; \beta)$ ,  $\pi_k = \text{P}(D = 1) = 1 - (1 - \pi)^k$ , and  $\mathbf{a}^{\otimes 2} = \mathbf{a} \mathbf{a}^T$  for a vector  $\mathbf{a}$ . The information for  $(\pi, \text{Se}, \text{Sp})$  is given by  $\mathbf{I}_{\text{vgs}} = \mathbf{J}^T \mathbf{I}_k \mathbf{J}$ , where  $\mathbf{J} = \partial \theta / \partial (\pi, \text{Se}, \text{Sp})^T$ .

For the VGS design, the Fisher information for  $\theta$  is given by  $\mathbf{I}_{\text{vgs}} = \sum_{k \in \mathcal{K}} \tau_k \mathbf{I}_{\text{vgs}, k}$ , where  $\mathbf{I}_{\text{vgs}, k}$  can be obtained from  $\mathbf{I}_k$  (defined above) by setting  $\gamma_0 = \gamma_1 = 0$ .

## Web Appendix B: Nonparametric Bootstrap CIs

Here we describe a general procedure for obtaining bootstrap CIs for an arbitrary parameter  $\theta$  in the VS or VGS design. In general, the observed data can be represented as  $(k_i, T_i, V_i, V_i D_i)$ ,  $i = 1, \dots, n$ . In the VS design, the  $k_i$  are identical and the  $V_i$  are random. In the VGS design, the  $k_i$  are variable and the  $V_i$  are identically 0 (so the  $D_i$  are never observed). To generate a bootstrap sample, we take a random sample with replacement from  $\{1, \dots, n\}$ , and obtain  $\{J_1, \dots, J_n\}$ . Then we calculate an estimate of  $\theta$  based on the bootstrap sample  $\{(k_{J_i}, T_{J_i}, V_{J_i}, V_{J_i} D_{J_i}), i = 1, \dots, n\}$ . This procedure will be repeated many times, resulting in  $\{\hat{\theta}_b, b = 1, \dots, B\}$ , where  $B$  is a large number to be specified by the analyst. Let  $\xi_p$  denote the  $p$ -quantile of  $\{\hat{\theta}_b, b = 1, \dots, B\}$ . Then a  $100(1 - \alpha)\%$  confidence interval for  $\theta$  is obtained as  $(\xi_{\alpha/2}, \xi_{1-\alpha/2})$ .

## Web Appendix C: Identification of $(\pi, \text{Se}, \text{Sp})$ Under the VGS Design and the Constancy Assumption

We assume that the support of  $k$  contains three distinct values, say  $k_1 < k_2 < k_3$ . Let  $p_k$  denote the (directly identifiable) probability of a positive test result for a group of size  $k$ , given by equation (1). For notational convenience, we write  $\boldsymbol{\vartheta} = (\vartheta_1, \vartheta_2, \vartheta_3)$  with  $\vartheta_1 = \text{Se}$ ,  $\vartheta_2 = \text{Se} + \text{Sp} - 1$ , and  $\vartheta_3 = 1 - \pi$ . Then equation (1) can be rewritten as

$$p_{k_\ell} = \vartheta_1 - \vartheta_2 \vartheta_3^{k_\ell}, \quad \ell = 1, 2, 3. \quad (\text{B.1})$$

Simple algebra yields that

$$p_{k_\ell} - p_{k_1} = \vartheta_2(\vartheta_3^{k_1} - \vartheta_3^{k_\ell}), \quad \ell = 2, 3, \quad (\text{B.2})$$

and that

$$\frac{p_{k_3} - p_{k_1}}{p_{k_2} - p_{k_1}} = \frac{\vartheta_3^{k_1} - \vartheta_3^{k_3}}{\vartheta_3^{k_1} - \vartheta_3^{k_2}} = \frac{1 - \vartheta_3^{d_{13}}}{1 - \vartheta_3^{d_{12}}}, \quad (\text{B.3})$$

where  $d_{1\ell} = k_\ell - k_1$ ,  $\ell = 2, 3$ . Now suppose there is another set of parameter values,  $\tilde{\boldsymbol{\vartheta}} = (\tilde{\vartheta}_1, \tilde{\vartheta}_2, \tilde{\vartheta}_3)$ , satisfying (B.1) and hence (B.2) and (B.3). We will show that  $\tilde{\boldsymbol{\vartheta}} = \boldsymbol{\vartheta}$ , starting with  $\tilde{\vartheta}_3 = \vartheta_3$ . From equation (B.3) we deduce that

$$\log(1 - \tilde{\vartheta}_3^{d_{13}}) - \log(1 - \tilde{\vartheta}_3^{d_{12}}) = \log(1 - \vartheta_3^{d_{13}}) - \log(1 - \vartheta_3^{d_{12}}).$$

If  $\tilde{\vartheta}_3 \neq \vartheta_3$ , then the mean value theorem implies that

$$0 = \frac{d}{dc} \log \frac{1 - c^{d_{13}}}{1 - c^{d_{12}}} \Big|_{c=c_0} = \frac{d_{12} c_0^{d_{12}-1}}{1 - c_0^{d_{12}}} - \frac{d_{13} c_0^{d_{13}-1}}{1 - c_0^{d_{13}}}$$

for some  $c_0$  between  $\vartheta_3$  and  $\tilde{\vartheta}_3$ . But this is impossible for  $c_0 \in (0, 1)$  and  $1 \leq d_{12} < d_{13}$ , because the function  $f(d) = dc_0^{d-1}/(1 - c_0^d)$  is strictly decreasing. The latter assertion can be verified by taking the derivative:

$$f'(d) = \frac{c_0^{d-1} \{1 + \log(c_0^d) - c_0^d\}}{(1 - c_0^d)^2} < 0.$$

This shows that  $\tilde{\vartheta}_3 = \vartheta_3$ , which implies  $\tilde{\vartheta}_2 = \vartheta_2$  and  $\tilde{\vartheta}_1 = \vartheta_1$  through equations (B.2) and (B.1).

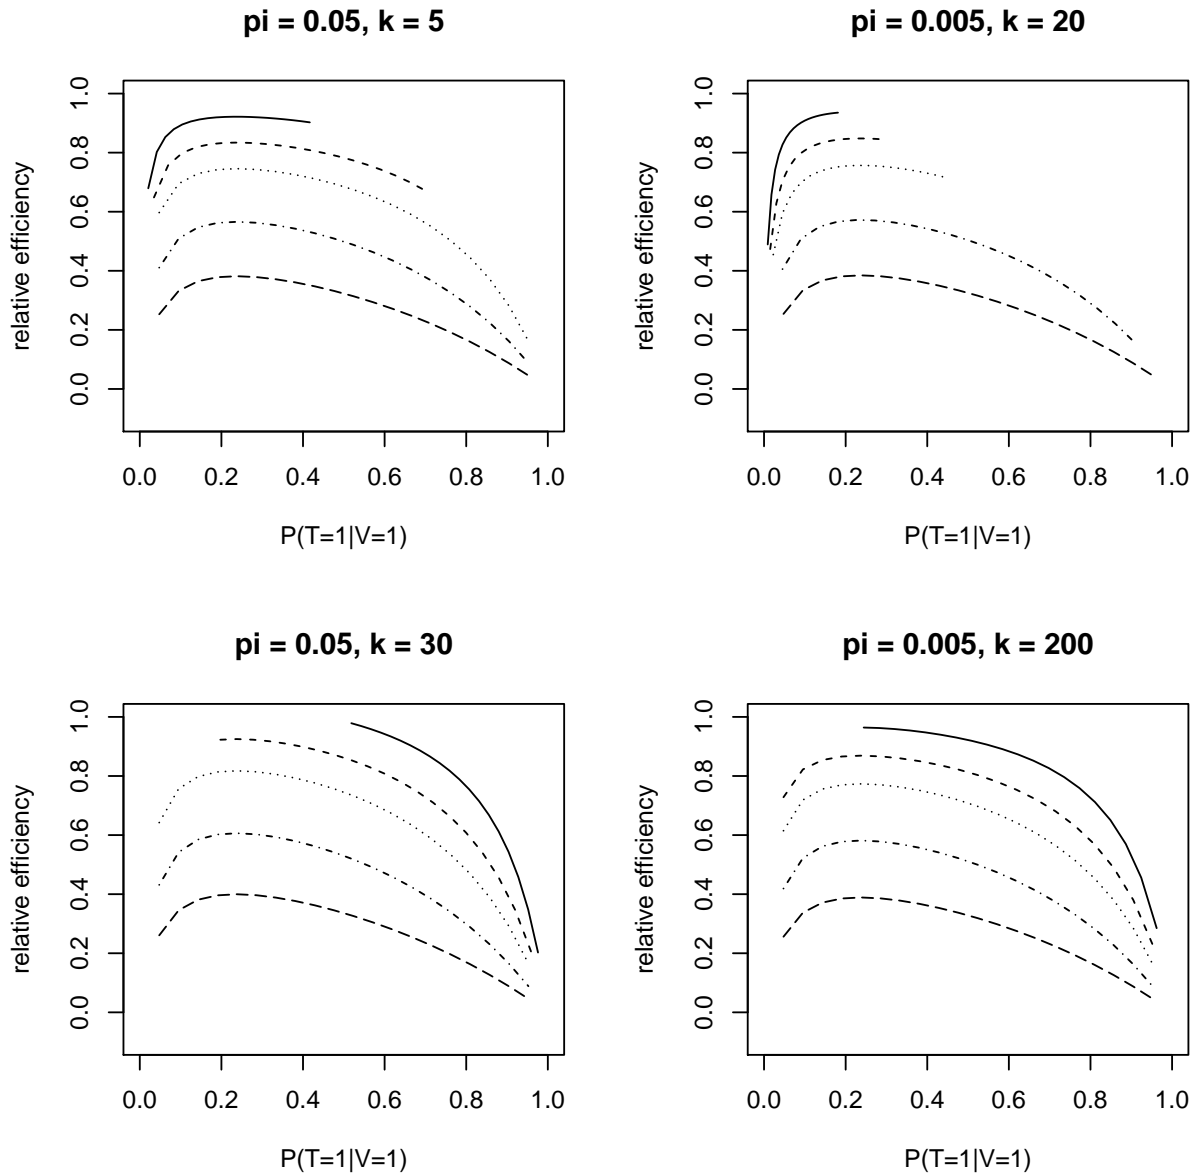

Web Figure 1: Allocation of the VS between  $T$ -positive and  $T$ -negative groups in the absence of a dilution effect: relative efficiency as a function of  $p_{k(V)} = P(T = 1|V = 1)$ , the proportion of  $T$ -positive groups in the VS, for selected values of  $\pi$ ,  $k$ , and the sampling fraction  $v = P(V = 1) \in \{0.5, 0.3, 0.2, 0.1, 0.05\}$  (from top curve to bottom curve within each panel).

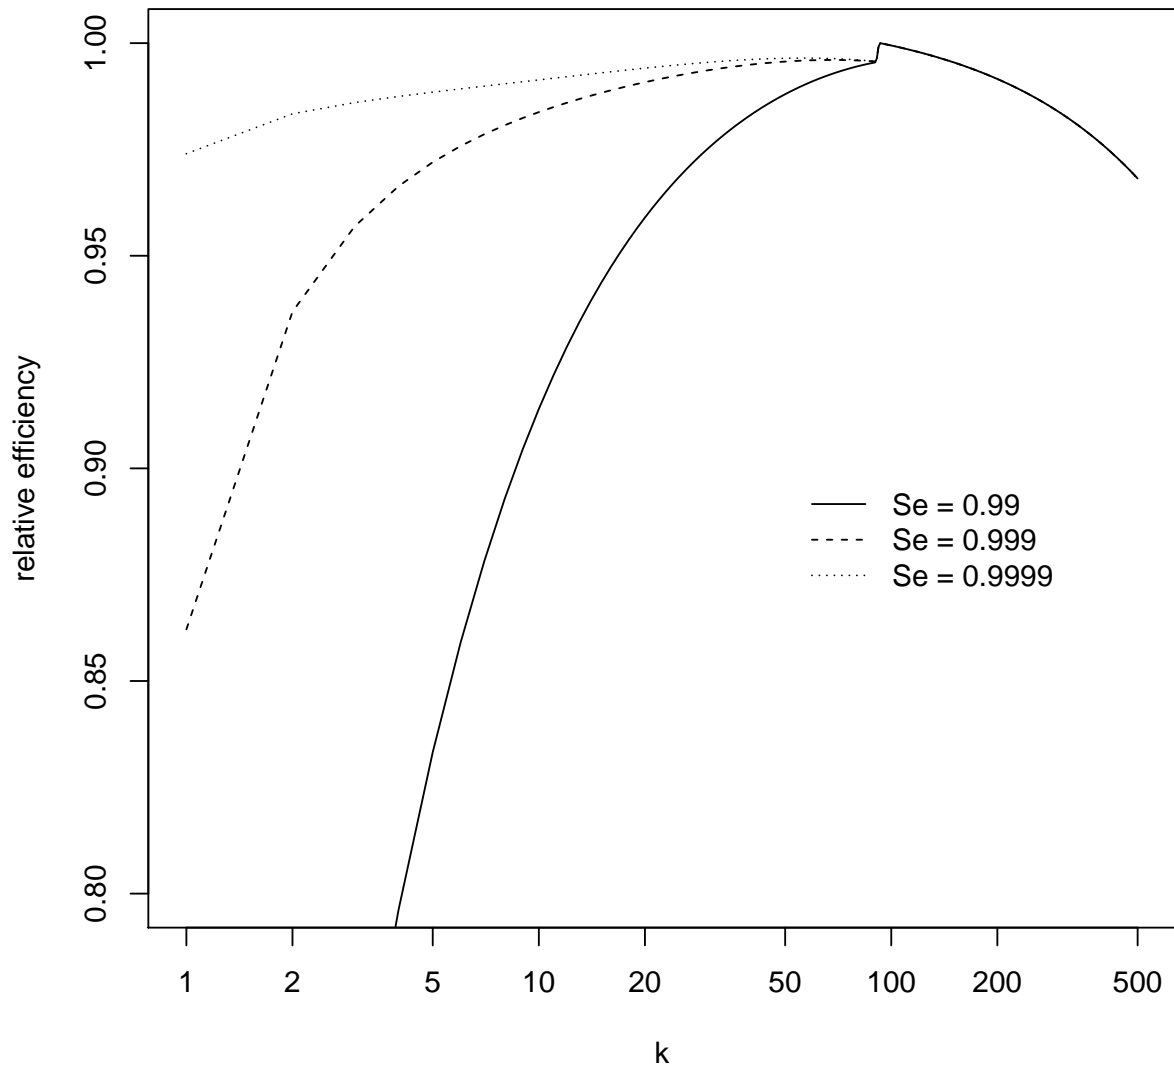

Web Figure 2: Design considerations for the Canadian blood donor study: relative efficiency as a function of  $k$ , for fixed  $m$  and  $N$  without a dilution effect.

Web Table 1: Simulation results for the VS design without a dilution effect: empirical relative bias and standard deviation (SD), proportion of replicate samples in which closed-form standard errors are available (SEA) from the observed information matrix, and coverage probability for  $(\pi, \text{Se}, \text{Sp})$  among the SEA samples, under different combinations of  $\pi$ ,  $k$  and the sampling fraction  $v = P(V = 1)$ .

| $k$           | $v$  | Relative Bias |       |       | SD ( $10^{-2}$ ) |       |      | P(SEA) | P(Coverage SEA) |      |      |
|---------------|------|---------------|-------|-------|------------------|-------|------|--------|-----------------|------|------|
|               |      | $\pi$         | Se    | Sp    | $\pi$            | Se    | Sp   |        | $\pi$           | Se   | Sp   |
| $\pi = 0.05$  |      |               |       |       |                  |       |      |        |                 |      |      |
| 1             | 1    | 0.001         | 0.000 | 0.000 | 0.22             | 0.99  | 0.07 | 1.00   | 0.95            | 0.95 | 0.95 |
|               | 0.5  | 0.000         | 0.000 | 0.000 | 0.22             | 1.39  | 0.07 | 1.00   | 0.95            | 0.96 | 0.95 |
|               | 0.2  | 0.000         | 0.001 | 0.000 | 0.25             | 2.34  | 0.08 | 0.98   | 0.95            | 0.97 | 0.95 |
|               | 0.1  | 0.000         | 0.001 | 0.000 | 0.28             | 3.26  | 0.11 | 0.87   | 0.96            | 0.96 | 0.95 |
|               | 0.05 | 0.000         | 0.002 | 0.000 | 0.35             | 4.63  | 0.15 | 0.63   | 0.98            | 0.94 | 0.96 |
| 5             | 1    | 0.000         | 0.000 | 0.000 | 0.10             | 0.45  | 0.08 | 1.00   | 0.95            | 0.95 | 0.95 |
|               | 0.5  | 0.000         | 0.000 | 0.000 | 0.11             | 0.64  | 0.11 | 1.00   | 0.95            | 0.96 | 0.95 |
|               | 0.2  | 0.000         | 0.000 | 0.000 | 0.12             | 1.01  | 0.17 | 1.00   | 0.95            | 0.95 | 0.96 |
|               | 0.1  | 0.000         | 0.000 | 0.000 | 0.14             | 1.40  | 0.24 | 0.98   | 0.95            | 0.96 | 0.96 |
|               | 0.05 | 0.000         | 0.000 | 0.000 | 0.17             | 1.98  | 0.34 | 0.87   | 0.95            | 0.97 | 0.96 |
| 30            | 1    | 0.000         | 0.000 | 0.000 | 0.06             | 0.24  | 0.15 | 1.00   | 0.95            | 0.95 | 0.96 |
|               | 0.5  | 0.000         | 0.000 | 0.000 | 0.06             | 0.25  | 0.26 | 0.98   | 0.95            | 0.95 | 0.96 |
|               | 0.2  | 0.000         | 0.000 | 0.000 | 0.07             | 0.30  | 0.60 | 0.50   | 0.96            | 0.95 | 0.94 |
|               | 0.1  | 0.000         | 0.000 | 0.000 | 0.08             | 0.41  | 0.85 | 0.29   | 0.96            | 0.95 | 0.83 |
|               | 0.05 | 0.000         | 0.000 | 0.000 | 0.10             | 0.59  | 1.16 | 0.15   | 0.97            | 0.94 | 0.90 |
| 60            | 1    | 0.000         | 0.000 | 0.000 | 0.07             | 0.22  | 0.33 | 0.90   | 0.95            | 0.95 | 0.96 |
|               | 0.5  | 0.000         | 0.000 | 0.000 | 0.07             | 0.22  | 0.49 | 0.65   | 0.95            | 0.95 | 0.96 |
|               | 0.2  | 0.000         | 0.000 | 0.000 | 0.07             | 0.23  | 0.92 | 0.25   | 0.95            | 0.95 | 0.87 |
|               | 0.1  | 0.001         | 0.000 | 0.000 | 0.08             | 0.24  | 1.83 | 0.06   | 0.98            | 0.95 | 0.00 |
|               | 0.05 | 0.001         | 0.000 | 0.001 | 0.10             | 0.29  | 2.48 | 0.03   | 1.00            | 0.93 | 0.00 |
| $\pi = 0.005$ |      |               |       |       |                  |       |      |        |                 |      |      |
| 1             | 1    | 0.001         | 0.000 | 0.000 | 0.07             | 3.13  | 0.07 | 0.91   | 0.94            | 0.96 | 0.95 |
|               | 0.5  | 0.002         | 0.001 | 0.000 | 0.07             | 4.30  | 0.07 | 0.71   | 0.95            | 0.95 | 0.95 |
|               | 0.2  | -0.002        | 0.004 | 0.000 | 0.08             | 6.48  | 0.07 | 0.38   | 0.95            | 0.87 | 0.95 |
|               | 0.1  | 0.002         | 0.008 | 0.000 | 0.09             | 8.63  | 0.07 | 0.20   | 0.97            | 0.88 | 0.94 |
|               | 0.05 | -0.001        | 0.017 | 0.000 | 0.11             | 10.41 | 0.07 | 0.10   | 0.97            | 0.01 | 0.94 |
| 20            | 1    | 0.000         | 0.000 | 0.000 | 0.02             | 0.71  | 0.07 | 1.00   | 0.95            | 0.95 | 0.95 |
|               | 0.5  | 0.000         | 0.000 | 0.000 | 0.02             | 1.04  | 0.08 | 1.00   | 0.95            | 0.95 | 0.95 |
|               | 0.2  | -0.001        | 0.001 | 0.000 | 0.02             | 1.65  | 0.11 | 1.00   | 0.95            | 0.96 | 0.95 |
|               | 0.1  | 0.000         | 0.001 | 0.000 | 0.02             | 2.35  | 0.15 | 0.98   | 0.95            | 0.96 | 0.96 |
|               | 0.05 | 0.000         | 0.001 | 0.000 | 0.03             | 3.31  | 0.21 | 0.86   | 0.97            | 0.95 | 0.96 |
| 100           | 1    | 0.000         | 0.000 | 0.000 | 0.01             | 0.35  | 0.09 | 1.00   | 0.95            | 0.95 | 0.95 |
|               | 0.5  | 0.000         | 0.000 | 0.000 | 0.01             | 0.44  | 0.16 | 1.00   | 0.95            | 0.95 | 0.96 |
|               | 0.2  | 0.000         | 0.000 | 0.000 | 0.01             | 0.69  | 0.25 | 0.98   | 0.95            | 0.95 | 0.96 |
|               | 0.1  | 0.000         | 0.000 | 0.000 | 0.01             | 0.96  | 0.36 | 0.85   | 0.95            | 0.95 | 0.95 |
|               | 0.05 | 0.000         | 0.000 | 0.000 | 0.01             | 1.34  | 0.51 | 0.61   | 0.96            | 0.95 | 0.93 |
| 200           | 1    | 0.000         | 0.000 | 0.000 | 0.01             | 0.27  | 0.12 | 1.00   | 0.95            | 0.95 | 0.95 |
|               | 0.5  | 0.000         | 0.000 | 0.000 | 0.01             | 0.28  | 0.26 | 0.98   | 0.95            | 0.95 | 0.97 |
|               | 0.2  | 0.000         | 0.000 | 0.000 | 0.01             | 0.43  | 0.41 | 0.76   | 0.96            | 0.95 | 0.93 |
|               | 0.1  | 0.000         | 0.000 | 0.000 | 0.01             | 0.59  | 0.58 | 0.51   | 0.96            | 0.95 | 0.93 |
|               | 0.05 | 0.000         | 0.000 | 0.000 | 0.01             | 0.83  | 0.81 | 0.30   | 0.97            | 0.95 | 0.84 |

Web Table 2: Selected  $k$ -values in the top candidate VGS designs shown in Figure 6.

| $\pi$ | Constraint | $K$       |            |             |              |
|-------|------------|-----------|------------|-------------|--------------|
|       |            | 5         | 15         | 50          | 150          |
| 0.05  | fixed $n$  | (1, 3, 5) | (1, 6, 15) | (1, 15, 50) | (1, 22, 150) |
|       | fixed $N$  | (1, 2, 5) | (1, 4, 15) | (1, 7, 50)  | (1, 12, 150) |
| 0.005 | fixed $n$  | (1, 3, 5) | (1, 6, 15) | (1, 15, 50) | (1, 22, 150) |
|       | fixed $N$  | (1, 2, 5) | (1, 4, 15) | (1, 7, 50)  | (1, 12, 150) |

Web Table 3: Simulation results for the VGS design without a dilution effect: empirical bias (relative for  $\pi$ , absolute for the other parameters) and standard deviation (SD), proportion of replicate samples in which closed-form standard errors are available (SEA) from the observed information matrix, and coverage probability for ( $\lambda = \text{logit}(\pi), \alpha = \text{logit}(\text{Se}), \beta = \text{logit}(\text{Sp})$ ) among the SEA samples, under different combinations of  $\pi$ ,  $K$  and  $n$ .

| $K$           | $n$    | Bias  |           |          | SD      |           |          | P(SEA)  |           |          | P(Coverage SEA) |           |          |         |
|---------------|--------|-------|-----------|----------|---------|-----------|----------|---------|-----------|----------|-----------------|-----------|----------|---------|
|               |        | $\pi$ | $\lambda$ | $\alpha$ | $\beta$ | $\lambda$ | $\alpha$ | $\beta$ | $\lambda$ | $\alpha$ | $\beta$         | $\lambda$ | $\alpha$ | $\beta$ |
| $\pi = 0.05$  |        |       |           |          |         |           |          |         |           |          |                 |           |          |         |
| 150           | 1000   | -0.01 | -0.01     | 0.15     | 1.51    | 0.07      | 0.97     | 2.68    | 0.99      | 0.99     | 0.86            | 0.95      | 0.97     | 0.84    |
| 50            | 1000   | 0.00  | -0.01     | 1.00     | 1.41    | 0.10      | 2.19     | 2.70    | 0.98      | 0.98     | 0.99            | 0.89      | 0.94     | 0.89    |
|               | 5000   | 0.00  | 0.00      | 0.40     | 2.51    | 0.05      | 1.44     | 2.44    | 1.00      | 0.94     | 0.62            | 0.91      | 0.97     | 0.87    |
|               | 10000  | 0.00  | 0.00      | 0.05     | 0.83    | 0.04      | 0.34     | 1.96    | 1.00      | 1.00     | 1.00            | 0.95      | 0.95     | 0.91    |
| 15            | 10000  | 0.02  | 0.02      | 1.15     | 1.03    | 0.11      | 2.16     | 2.03    | 0.91      | 0.92     | 0.98            | 0.78      | 0.88     | 0.93    |
|               | 100000 | 0.01  | 0.01      | 0.14     | 1.19    | 0.05      | 0.95     | 2.42    | 0.90      | 0.90     | 0.82            | 0.92      | 0.90     | 0.95    |
| 5             | 100000 | 0.07  | 0.06      | -0.14    | 0.48    | 0.16      | 1.11     | 1.21    | 0.78      | 0.78     | 0.89            | 0.94      | 0.87     | 0.94    |
| $\pi = 0.005$ |        |       |           |          |         |           |          |         |           |          |                 |           |          |         |
| 150           | 5000   | 0.05  | 0.04      | 0.98     | 0.95    | 0.13      | 2.38     | 2.04    | 0.98      | 0.98     | 0.99            | 0.88      | 0.84     | 0.95    |
|               | 10000  | 0.03  | 0.02      | 1.05     | 0.58    | 0.11      | 2.22     | 1.45    | 0.92      | 0.92     | 0.96            | 0.94      | 0.85     | 0.95    |
| 50            | 10000  | 0.29  | 0.20      | -0.19    | 0.45    | 0.33      | 2.11     | 1.26    | 0.89      | 0.89     | 0.99            | 0.89      | 0.73     | 0.96    |
|               | 100000 | 0.05  | 0.05      | -0.01    | 0.03    | 0.12      | 1.17     | 0.19    | 0.82      | 0.82     | 0.99            | 0.94      | 0.86     | 0.95    |
| 15            | 100000 | 0.19  | 0.08      | -0.19    | 0.03    | 0.34      | 1.03     | 0.17    | 0.57      | 0.57     | 0.99            | 0.92      | 0.90     | 0.94    |
| 5             | 100000 | 0.01  | 0.00      | -0.03    | 0.03    | 0.06      | 0.24     | 0.19    | 0.33      | 0.33     | 1.00            | 1.00      | 1.00     | 0.96    |
